# Supplementary material for: Combining physical and geochemical methods to investigate lowerhalocline water formation and modification along the Siberiancontinental slope
Source: Copernicus journal article supplement (doi:10.5194/os-2017-55), 2017-06-27
Supplement: Supplementary file 1 [file os-2017-55-supplement.pdf]

## Contents of this file

Text S1 to S2  
Tables S1 to S5  
Figures S1 to S2

## Introduction

The following supporting information includes text describing the instruments and methods used for data collection (Text S1) and the water type analysis used to estimate fractional contributions of meteoric water, net sea-ice meltwater, and Atlantic water to each discrete water sample collected during the 2013 and 2015 cruises (Text S2). Included tables summarize linear regressions of salinity and stable oxygen isotope ratio ( $\delta^{18}\text{O}$ ) data in specified salinity ranges from the 2013 cruise (Tables S1 and S2), 2015 cruise (Tables S4 and S5), and additional data sets for comparison (Table S6). Table S3 summarizes the winter mixed layer depths and estimates of the mean salinities and potential temperatures of the subsequent winter mixed layer. Figure S1 provides a schematic of salinity and  $\delta^{18}\text{O}$  changes that take place during the transition of halocline waters from the sea-ice melt branch mixing regime to the meteoric water branches as a result of mixing with overlying freshwaters, brine expulsion during ice formation, and mixing with underlying Atlantic waters. Figure S2 compares the salinity and  $\delta^{18}\text{O}$  data collected during the 2013 cruise data and used to define mixing relationships in the salinity range  $34 \leq S < 34.5$  against the salinity and  $\delta^{18}\text{O}$  characteristics of lower halocline water types defined by *Bauch et al.*, [2016].

**Text S1.** Full description of instrumentation and water sampling methods employed during the 2013 and 2015 cruises.

The sensor suite utilized during the 2013 and 2015 cruises included a Seabird SBE9*plus* conductivity-temperature-depth (CTD) equipped with dual temperature (SBE3), conductivity (SBE4), and dissolved oxygen (SBE43) sensors, SBE5T submersible pump, and a digi-quartz pressure sensor. Additional channels of the CTD system were directly connected to external sensors mounted on the carousel, including a WET Labs ECO-FLNTU chlorophyll and turbidity sensor, a WET Labs C-Star transmissometer (beam transmission and attenuation), a photosynthetically-active radiation (PAR) sensor (Biospherical model QCP2350), and a Satlantic Deep Submersible Ultraviolet Nitrate Analyzer (SUNA). A Benthos PSA-916 altimeter was also mounted to the bottom of the rosette to avoid hitting the carousel on the seafloor. Finally, twenty-four Niskin bottles (10 L capacity) were included for the collection of water samples at specified depths. All instruments were levelly mounted in the bottom section of the carousel directly below the Niskin bottles. Data was monitored and acquired during each cast using a Seabird SBE11*plus* Deck Unit.

During each cast, the rosette was moved outside to the starboard (2013) or port side (2015) deck from either a warmed container on deck using a wheeled cart (2013) or from the hydrology lab inside the ship using a hydraulic crane (2015). The rosette was then transferred to a winch and lowered over the side of the vessel to a depth of ~15 m for initialization and sensor equilibration. The rosette was then brought up to the surface (0-3 m) and then lowered through the water column at a relatively constant rate to a depth of either ~1000 m or between 5 and 20 m above the bottom (most casts were conducted to ~1000 m as some instruments cannot withstand pressures exceeding 1000 db). Once the maximum depth was reached, the rosette was stopped and a Niskin bottle was fired to obtain a water sample. The rosette was then brought back up through the water column and routinely stopped at depths of 500, 250, 200, 150, 140, 130, 120, 110, 100, 90, 80, 70, 60, 50, 40, 30, 20, 10, and 2-4 m (surface) for the collection of water samples (alternate or additional depths were tripped on a cast-by-cast basis). The rosette was stopped for a period of ~30 seconds before sample collection to allow the bottles to soak and minimize turbulent flows caused the carousel's wake as it moved upward through the water column. Once the rosette reached the surface, it was brought back on deck and transferred inside the hydrology lab using the crane.

Salinity samples were collected into 125-mL glass bottles equipped with polyethylene inserts to prevent evaporation. In 2013, salinity samples were analyzed via salinometer onboard after a 12-hour temperature equilibration. However, unstable laboratory temperatures prevented the collection of quality data from the salinometer; thus, the bottle salinity data was not utilized from the 2013 cruise. In 2015, bottle samples ( $n = 93$ ) for salinity determinations were collected and shipped back to the University of Washington for analysis using a Guideline 8400B salinometer (calibrated with IAPSO standard seawater) at the Marine Chemistry Laboratory (UW Oceanography). The majority (76 %) of bottle salinities differed from CTD salinities by  $\leq 0.04$ , though larger discrepancies did occur (49 % of available comparisons indicated differences of  $\leq 0.01$  and 86 % indicated differences  $\leq 0.1$ ).

## Text S2: Full description of water type analysis methods.

Fractional contributions of meteoric water (MW) and net sea-ice meltwater (SIM), and a saline water endmember (Atlantic seawater, AW, for the purposes of this study) can be quantified using salinity and  $\delta^{18}\text{O}$  observations in a set of coupled equations that also conserves mass (or volume):

$$S_{\text{SIM}} \times f_{\text{SIM}} + S_{\text{MW}} \times f_{\text{MW}} + S_{\text{AW}} \times f_{\text{AW}} = S_{\text{obs}} \quad (1)$$

$$\delta^{18}\text{O}_{\text{SIM}} \times f_{\text{SIM}} + \delta^{18}\text{O}_{\text{MW}} \times f_{\text{MW}} + \delta^{18}\text{O}_{\text{AW}} \times f_{\text{AW}} = \delta^{18}\text{O}_{\text{obs}} \quad (2)$$

$$f_{\text{SIM}} + f_{\text{MW}} + f_{\text{AW}} = 1 \quad (3)$$

where  $f$  equals the fractional contributions of the three water types (i.e., SIM, MW, and AW) and  $S$  and  $\delta^{18}\text{O}$  represent the characteristic salinities and stable oxygen isotopic ratios associated with these water types. Note that net sea-ice formation (formation exceeding melting) will generate a negative SIM fraction ( $f_{\text{SIM}} < 0$ ), representing an extraction of liquid water into the solid phase (ice) and the release of brine into the water column. This water type analysis assumes that salinity and  $\delta^{18}\text{O}$  values that characterize MW, SIM, and AW (commonly referred to as endmember values) are well known and relatively stable over time. However, there is seasonal and interannual variability associated with these endmember values that should be taken into account when conducting a water type analysis. Thus, estimates of uncertainty in the water type fractions resulting from the analysis can be computed by varying the endmember values within reasonable ranges of natural variability. In this study, meteoric water  $\delta^{18}\text{O}$  endmember values were varied between -22 and -18 ‰. The salinity of meteoric water is zero by definition. Sea-ice meltwater salinity and  $\delta^{18}\text{O}$  endmember values were varied between 2 and 8 and -2 and +3 ‰, respectively. Atlantic seawater salinity and  $\delta^{18}\text{O}$  endmember values were varied between 34.85 and 35 and 0.25 and 0.35 ‰, respectively.

Similar to the methods described in *Alkire et al.* [2015], the water type analysis was iterated 1,000 times for each salinity and  $\delta^{18}\text{O}$  pair. The set of endmember values characterizing MW, SIM, and AW were randomly selected from the specified ranges for each iteration. Though the endmember selection was randomized, it was organized in such a way that allowed all values within each range to be selected an equal number of times. Averages of the MW, SIM, and AW fractions (1,000 values for each salinity,  $\delta^{18}\text{O}$  pair) were taken as the best estimate of the water type fractions and associated standard deviations taken as estimates of uncertainties due to natural variations in the endmember assignments. The median standard deviations for MW, SIM, and AW fractions were 0.24, 0.36, and 0.20 % for the 2013 cruise and 0.29, 0.41, and 0.21 % for the 2015 cruise, respectively. Note that these uncertainties are *absolute* uncertainties (e.g., meteoric water fraction reported as  $8 \pm 0.24$  %).

**Table S1.** Linear regression analyses (restricted to salinities  $\geq 34.5$ ) of salinity- $\delta^{18}\text{O}$  measurements collected along transects occupied during the 2013. Slopes, intercepts, correlation coefficients (r) and associated standard errors (se) are reported for each transect as well as the collection of transects comprising the sea-ice melt (SIM) and meteoric (MW) water branches.

| <b>Transect</b>   | <b>Slope</b>  | <b>se</b>     | <b>Intercept</b> | <b>se</b>     | <b>Corrcoeff</b> | <b>Stations</b> |
|-------------------|---------------|---------------|------------------|---------------|------------------|-----------------|
| SAT               | 0.2059        | 0.0395        | -6.9306          | 1.3715        | 0.6016           | 109-116         |
| L1                | 0.2626        | 0.0545        | -8.8868          | 1.8945        | 0.8005           | 97-108          |
| L2                | 0.2471        | 0.0292        | -8.3596          | 1.0156        | 0.6656           | 82-91           |
| L3 upper          | 0.2477        | 0.0373        | -8.4049          | 1.2958        | 0.6919           | 76-81           |
| L4 upper          | 0.1415        | 0.0412        | -4.7276          | 1.4298        | 0.6632           | 68-69           |
| <b>SIM Branch</b> | <b>0.2287</b> | <b>0.0347</b> | <b>-7.7306</b>   | <b>1.2044</b> | <b>0.6632</b>    |                 |
| L3 lower          | 0.4589        | 0.0424        | -15.7646         | 1.4703        | 0.8864           | 70-75           |
| L4 lower          | 0.5693        | 0.0577        | -19.6058         | 2.0035        | 0.8776           | 63-66           |
| L5                | 0.631         | 0.0379        | -21.793          | 1.3131        | 0.8690           | 10-26 & 60-62   |
| <b>MW Branch</b>  | <b>0.6016</b> | <b>0.0321</b> | <b>-20.7517</b>  | <b>1.1141</b> | <b>0.8328</b>    |                 |
| L5.5              | 0.7521        | 0.2182        | -25.9928         | 7.5479        | 0.7054           | 45-59           |
| L6                | 0.7265        | 0.0924        | -25.0783         | 3.195         | 0.8537           | 29-38           |

**Table S2.** Linear regression analyses (restricted to the salinity range:  $34 \leq S < 34.5$ ) of salinity- $\delta^{18}\text{O}$  measurements collected along transects occupied during the 2013. Slopes, intercepts, correlation coefficients (r) and associated standard errors (se) are reported for each transect as well as the collection of transects comprising the sea-ice melt (SIM) and meteoric (MW) water branches.

| <b>Transect</b>   | <b>Slope</b>  | <b>se</b>     | <b>Intercept</b> | <b>se</b>     | <b>Corrcoeff</b> | <b>Stations</b> |
|-------------------|---------------|---------------|------------------|---------------|------------------|-----------------|
| SAT               | 0.2361        | 0.0522        | -7.9857          | 1.786         | 0.6863           | 109-116         |
| L1                | 0.1113        | 0.225         | -3.6912          | 7.7323        | 0.1266           | 97-108          |
| L2                | 0.2048        | 0.063         | -6.9215          | 2.1638        | 0.5105           | 82-91           |
| L3 upper          | 0.1975        | 0.0605        | -6.684           | 2.0747        | 0.6446           | 76-81           |
| L4 upper          | 0.1816        | 0.0659        | -6.1461          | 2.2606        | 0.7216           | 68-69           |
| <b>SIM Branch</b> | <b>0.1871</b> | <b>0.0422</b> | <b>-6.3148</b>   | <b>1.4463</b> | <b>0.6167</b>    |                 |
| L3 lower          | 1.4715        | 0.0455        | -50.6961         | 1.5618        | 0.9837           | 70-75           |
| L4 lower          | 1.1334        | 0.1018        | -39.0734         | 3.4945        | 0.9345           | 63-66           |
| L5                | 1.2739        | 0.0462        | -43.9486         | 1.5859        | 0.9356           | 10-26 & 60-62   |
| <b>MW Branch</b>  | <b>1.3126</b> | <b>0.0364</b> | <b>-45.2639</b>  | <b>1.2482</b> | <b>0.9421</b>    |                 |
| L5.5              | 0.6543        | 0.0822        | -22.5928         | 2.8197        | 0.7411           | 45-59           |
| L6                | 0.643         | 0.075         | -22.2101         | 2.5717        | 0.8867           | 29-38           |

**Table S3.** Winter mixed layer (WML) depth, salinity, and potential temperature ( $\theta$ ) estimated from CTD data by identifying the minimum potential temperature below the surface mixed layer. “Salt mixed” and “ $\theta$  mixed” refer to the mean salinities and potential temperatures estimated from individual profiles assuming the water column will be homogenized down to the previous year’s WML.

| Station | Transect | WML Depth<br>(m) | WML Salinity | WML $\theta$ | Salt mixed | $\theta$ mixed |
|---------|----------|------------------|--------------|--------------|------------|----------------|
| 1       | -        | 52               | 34.556       | -0.699       | 34.112     | 1.009          |
| 2       | -        | 56               | 34.367       | -1.674       | 33.867     | -1.317         |
| 3       | -        | 17               | 33.667       | -1.512       | 33.349     | -1.473         |
| 4       | -        | 17               | 33.321       | -1.642       | 33.167     | -1.409         |
| 5       | -        | 49               | 34.443       | -1.485       | 33.563     | -1.240         |
| 6       | -        | 48               | 34.236       | -1.663       | 32.940     | -0.403         |
| 7       | L5       | 46               | 34.295       | -1.571       | 32.877     | -0.114         |
| 8       | L5       | 58               | 34.365       | -1.559       | 33.071     | -0.220         |
| 9       | L5       | 85               | 34.282       | -1.659       | 33.084     | -0.417         |
| 10      | L5       | 87               | 34.317       | -1.611       | 33.350     | -0.631         |
| 11      | L5       | 58               | 34.024       | -1.750       | 32.457     | -0.503         |
| 12      | L5       | 50               | 33.893       | -1.792       | 32.895     | -1.097         |
| 13      | L5       | 64               | 33.895       | -1.799       | 32.744     | -1.272         |
| 14      | L5       | 56               | 33.918       | -1.797       | 32.947     | -1.486         |
| 15      | L5       | 52               | 34.023       | -1.775       | 33.315     | -1.611         |
| 16      | L5       | 67               | 34.210       | -1.727       | 33.573     | -1.667         |
| 17      | L5       | 53               | 33.968       | -1.762       | 33.141     | -1.653         |
| 18      | L5       | 52               | 34.149       | -1.721       | 33.285     | -1.589         |
| 19      | L5       | 40               | 33.995       | -1.733       | 33.098     | -1.622         |
| 20      | L5       | 42               | 34.011       | -1.747       | 32.939     | -1.611         |
| 21      | L5       | 59               | 33.994       | -1.745       | 33.076     | -1.622         |
| 22      | L5       | 45               | 33.720       | -1.730       | 32.331     | -1.577         |
| 23      | L5       | 55               | 33.934       | -1.754       | 32.526     | -1.627         |
| 24      | L5       | 39               | 33.383       | -1.770       | 32.022     | -1.610         |
| 25      | L5       | 68               | 33.838       | -1.819       | 32.630     | -1.671         |
| 26      | L5       | 47               | 33.464       | -1.759       | 31.888     | -1.611         |
| 27      | -        | 53               | 33.614       | -1.713       | 32.069     | -1.667         |
| 28      | -        | 60               | 33.527       | -1.783       | 32.662     | -1.711         |
| 29      | L6       | 70               | 34.022       | -1.675       | 31.551     | -1.127         |
| 30      | L6       | 70               | 34.056       | -1.633       | 31.863     | -1.348         |
| 31      | L6       | 61               | 33.801       | -1.655       | 31.125     | -1.320         |
| 32      | L6       | 73               | 34.006       | -1.664       | 31.556     | -1.482         |
| 33      | L6       | 51               | 33.513       | -1.717       | 31.161     | -1.434         |
| 34      | L6       | 46               | 32.992       | -1.675       | 30.677     | -1.489         |
| 35      | L6       | 40               | 32.340       | -1.620       | 30.412     | -1.468         |
| 36      | L6       | 44               | 33.242       | -1.739       | 30.896     | -1.532         |

|    |      |    |        |        |        |        |
|----|------|----|--------|--------|--------|--------|
| 37 | L6   | 46 | 32.973 | -1.731 | 31.123 | -1.603 |
| 38 | L6   | 75 | 34.020 | -1.706 | 32.116 | -1.597 |
| 39 | -    | 59 | 33.150 | -1.753 | 32.020 | -1.659 |
| 40 | -    | 44 | 32.557 | -1.673 | 30.467 | -1.254 |
| 41 | -    | 46 | 32.484 | -1.742 | 31.099 | -1.620 |
| 42 | -    | 39 | 32.494 | -1.712 | 31.246 | -1.651 |
| 43 | -    | 37 | 32.202 | -1.679 | 31.044 | -1.652 |
| 44 | -    | 52 | 32.384 | -1.693 | 31.357 | -1.668 |
| 45 | L5.5 | 43 | 33.180 | -1.600 | 30.802 | -0.745 |
| 46 | L5.5 | 51 | 33.897 | -1.659 | 31.681 | -0.435 |
| 47 | L5.5 | 47 | 33.912 | -1.479 | 32.008 | -0.423 |
| 48 | L5.5 | 48 | 33.980 | -1.683 | 32.122 | -0.542 |
| 49 | L5.5 | 63 | 34.234 | -1.571 | 32.614 | -0.603 |
| 50 | L5.5 | 58 | 34.203 | -1.591 | 32.590 | -0.622 |
| 51 | L5.5 | 37 | 33.830 | -1.608 | 31.905 | -0.713 |
| 52 | L5.5 | 45 | 33.756 | -1.750 | 32.247 | -1.195 |
| 53 | L5.5 | 50 | 33.638 | -1.729 | 32.175 | -0.839 |
| 54 | L5.5 | 41 | 33.873 | -1.679 | 32.140 | -0.129 |
| 55 | L5.5 | 46 | 33.809 | -1.758 | 32.300 | -1.107 |
| 56 | L5.5 | 50 | 33.867 | -1.776 | 32.323 | -1.124 |
| 57 | L5.5 | 59 | 33.921 | -1.774 | 32.931 | -1.100 |
| 58 | L5.5 | 63 | 33.961 | -1.766 | 32.750 | -0.673 |
| 59 | -    | 65 | 34.051 | -1.728 | 33.112 | -0.711 |
| 60 | L5   | 62 | 33.986 | -1.762 | 32.831 | -0.674 |
| 61 | L5   | 44 | 33.991 | -1.728 | 33.177 | -1.271 |
| 62 | L5   | 44 | 34.000 | -1.737 | 33.045 | -1.000 |
| 63 | L4   | 13 | 32.070 | -1.704 | 32.070 | -1.699 |
| 64 | L4   | 36 | 34.166 | -1.665 | 33.418 | -1.486 |
| 65 | L4   | 26 | 33.959 | -1.670 | 32.814 | -1.067 |
| 66 | L4   | 30 | 33.740 | -1.644 | 33.104 | -1.301 |
| 67 | L4   | 42 | 34.297 | -1.688 | 33.673 | -1.421 |
| 68 | L4   | 51 | 34.334 | -1.689 | 33.783 | -1.381 |
| 69 | L4   | 46 | 34.353 | -1.716 | 33.739 | -1.404 |
| 70 | L3   | 20 | 32.257 | -1.718 | 32.246 | -1.714 |
| 71 | L3   | 15 | 31.864 | -1.718 | 31.864 | -1.719 |
| 72 | L3   | 20 | 32.507 | -1.755 | 32.427 | -1.754 |
| 73 | L3   | 31 | 34.028 | -1.681 | 33.006 | -1.669 |
| 74 | L3   | 31 | 33.955 | -1.686 | 33.097 | -1.588 |
| 75 | L3   | 22 | 34.040 | -1.683 | 33.327 | -1.517 |
| 76 | L3   | 33 | 34.195 | -1.663 | 33.208 | -1.602 |
| 77 | L3   | 48 | 34.322 | -1.681 | 33.715 | -1.560 |
| 78 | L3   | 52 | 34.354 | -1.610 | 33.692 | -1.441 |
| 79 | L3   | 14 | 32.880 | -1.395 | 32.879 | -1.397 |

|                            |     |           |               |               |               |               |
|----------------------------|-----|-----------|---------------|---------------|---------------|---------------|
| 80                         | L3  | 16        | 32.831        | -1.166        | 32.818        | -1.148        |
| 81                         | L3  | 13        | 32.995        | -1.293        | 32.989        | -1.295        |
| 82                         | L2  | 14        | 33.747        | -1.029        | 33.738        | -1.016        |
| 83                         | L2  | 180       | 34.803        | -0.315        | 34.553        | 0.070         |
| 84                         | L2  | 199       | 34.854        | -0.201        | 34.480        | 0.274         |
| 85                         | L2  | 54        | 34.309        | -1.385        | 33.709        | -0.538        |
| 86                         | L2  | 53        | 34.336        | -1.566        | 33.798        | -0.783        |
| 87                         | L2  | 42        | 34.370        | -1.545        | 33.711        | -0.567        |
| 88                         | L2  | 55        | 34.360        | -1.584        | 33.799        | -0.664        |
| 89                         | L2  | 51        | 34.392        | -1.623        | 33.825        | -0.995        |
| 90                         | L2  | 52        | 34.390        | -1.694        | 33.893        | -1.255        |
| 91                         | L2  | 58        | 34.405        | -1.723        | 33.800        | -1.410        |
| 92                         | L2  | 13        | 32.949        | -1.670        | 32.938        | -1.680        |
| 93                         | L2  | 51        | 34.393        | -1.648        | 33.823        | -1.166        |
| 94                         | -   | 87        | 34.419        | -1.770        | 34.014        | -1.624        |
| 95                         | -   | 16        | 32.354        | -1.761        | 32.357        | -1.759        |
| 96                         | -   | 13        | 32.699        | -1.771        | 32.683        | -1.773        |
| 97                         | L1  | 13        | 32.797        | -1.775        | 32.797        | -1.775        |
| 98                         | L1  | 13        | 32.967        | -1.704        | 32.739        | -1.751        |
| 99                         | L1  | 85        | 34.366        | -1.795        | 33.925        | -1.647        |
| 100                        | L1  | 94        | 34.375        | -1.701        | 34.075        | -1.593        |
| 101                        | L1  | 71        | 34.370        | -1.764        | 34.050        | -1.601        |
| 102                        | L1  | 58        | 34.367        | -1.719        | 34.004        | -1.460        |
| 103                        | L1  | 58        | 34.372        | -1.710        | 33.860        | -1.332        |
| 104                        | L1  | 66        | 34.390        | -1.705        | 33.995        | -1.409        |
| 105                        | L1  | 59        | 34.379        | -1.728        | 33.942        | -1.337        |
| 106                        | L1  | 30        | 34.363        | -1.547        | 33.654        | -0.659        |
| 107                        | L1  | 45        | 34.289        | -1.610        | 33.781        | -0.443        |
| 108                        | L1  | 45        | 34.292        | -1.589        | 33.737        | -0.198        |
| 109                        | SAT | 137       | 34.797        | -0.659        | 34.579        | 0.263         |
| 110                        | SAT | 154       | 34.813        | -0.669        | 34.592        | 0.222         |
| 111                        | SAT | 199       | 34.824        | -0.628        | 34.710        | 0.672         |
| 112                        | SAT | 43        | 34.583        | -0.213        | 34.245        | 1.788         |
| 113                        | SAT | 42        | 34.526        | -0.535        | 34.010        | 1.085         |
| 114                        | SAT | 38        | 34.337        | -1.411        | 33.769        | -0.176        |
| 115                        | SAT | 35        | 34.274        | -1.355        | 33.708        | 0.080         |
| 116                        | SAT | 39        | 34.322        | -1.321        | 33.626        | 0.141         |
| <b>Averages</b>            |     |           |               |               |               |               |
| <b>ALL stations</b>        |     | <b>52</b> | <b>33.840</b> | <b>-1.581</b> | <b>32.899</b> | <b>-1.081</b> |
| <b>SIM Branch stations</b> |     | <b>62</b> | <b>34.216</b> | <b>-1.376</b> | <b>33.788</b> | <b>-0.780</b> |

**Table S4.** Linear regression analyses (restricted to salinities  $\geq 34.5$ ) of salinity- $\delta^{18}\text{O}$  measurements collected along transects occupied during the 2015. Slopes, intercepts, correlation coefficients (r) and associated standard errors (se) are reported for each transect.

| <b>Transect</b> | <b>Slope</b> | <b>se</b> | <b>Intercept</b> | <b>se</b> | <b>Corrcoeff</b> | <b>Stations</b> |
|-----------------|--------------|-----------|------------------|-----------|------------------|-----------------|
| SAT             | 0.2243       | 0.0723    | -7.5502          | 2.5162    | 0.299            | 81-93           |
| L2              | 0.4317       | 0.0418    | -14.8127         | 1.4567    | 0.7723           | 2-9 & 78-79     |
| L5              | 0.6056       | 0.0345    | -20.8911         | 1.1974    | 0.8454           | 10-24 & 72-76   |
| L6              | 0.572        | 0.0436    | -19.7179         | 1.5128    | 0.8763           | 27-38           |
| 165E            | 0.7238       | 0.147     | -24.9681         | 5.1044    | 0.7017           | 39-54           |
| 175E            | 0.5906       | 0.104     | -20.3403         | 3.6086    | 0.6777           | 56-71           |

**Table S5.** Linear regression analyses (restricted to the salinity range:  $34 \leq S < 34.5$ ) of salinity- $\delta^{18}\text{O}$  measurements collected along transects occupied during the 2015. Slopes, intercepts, correlation coefficients (r) and associated standard errors (se) are reported for each transect.

| <b>Transect</b> | <b>Slope</b> | <b>se</b> | <b>Intercept</b> | <b>se</b> | <b>Corrcoeff</b> | <b>Stations</b> |
|-----------------|--------------|-----------|------------------|-----------|------------------|-----------------|
| SAT             | 0.3252       | 0.1944    | -11.0302         | 6.6668    | 0.5092           | 81-93           |
| L2              | 0.3292       | 0.0839    | -11.2715         | 2.8837    | 0.5887           | 2-9 & 78-79     |
| L5              | 1.556        | 0.107     | -53.6881         | 3.6745    | 0.8267           | 10-24 & 72-76   |
| L6              | 1.3081       | 0.0716    | -45.0777         | 2.4549    | 0.9048           | 27-38           |
| 165E            | 0.8079       | 0.0824    | -27.9041         | 2.8254    | 0.8499           | 39-54           |
| 175E            | 1.1662       | 0.0746    | -40.239          | 2.5568    | 0.9472           | 56-71           |

**Table S6.** Linear regression analyses of salinity- $\delta^{18}\text{O}$  measurements available from different data sets, including the North Pole Environmental Observatory (NPEO) [Alkire *et al.*, 2015], Global Seawater Oxygen-18 Database [Schmidt *et al.*, 1999], and *Polarstern* cruise ARK-XXI/2 [Bauch *et al.*, 2011]. Slopes, intercepts, and correlation coefficients are reported for each data set. NPEO data were collected annually between 2000 and 2015 (no data from 2009) at latitudes  $\geq 85^\circ\text{N}$ , primarily along longitudinal transects  $90^\circ\text{E}$  and  $180^\circ$  [Alkire *et al.*, 2015]. Measurements from the O-18 Database were restricted to those collected after 2000 (2000, 2001, 2007, 2008), latitudes  $\geq 75^\circ\text{N}$ , and longitudes ranging between  $65$  and  $160^\circ\text{E}$  to best resemble the area studied in 2013. ARK-XXII/2 data were similarly restricted to latitudes  $\geq 75^\circ\text{N}$  and longitudes  $65$ - $160^\circ\text{E}$ . A second longitudinal restriction ( $110$ - $160^\circ\text{E}$ ) was employed on the ARK-XXII/2 data to investigate the spatial dependence on the regression coefficients.

| Data Source   | Years                       | Salinity Range     | Slope  | Intercept | Corrcoef | N   |
|---------------|-----------------------------|--------------------|--------|-----------|----------|-----|
| NPEO          | 2000-2015                   | $S \geq 34.5$      | 0.6690 | -23.1220  | 0.7877   | 141 |
|               |                             | $34 \leq S < 34.5$ | 1.1423 | -39.4408  | 0.6305   | 162 |
| O-18 Database | 2000-2014                   | $S \geq 34.5$      | 0.5401 | -18.5999  | .6571    | 606 |
|               |                             | $34 \leq S < 34.5$ | 0.9234 | -31.8298  | .6757    | 153 |
| ARK-XXII/2    | 2007                        | $S \geq 34.5$      | 0.3749 | -12.9036  | 0.5923   | 104 |
|               |                             | $34 \leq S < 34.5$ | 0.2478 | -8.6570   | 0.2219   | 113 |
|               | $110$ - $160^\circ\text{E}$ | $S \geq 34.5$      | 0.3796 | -13.1062  | 0.4748   | 24  |
|               | $110$ - $160^\circ\text{E}$ | $34 \leq S < 34.5$ | 0.5205 | -18.0897  | 0.5868   | 59  |

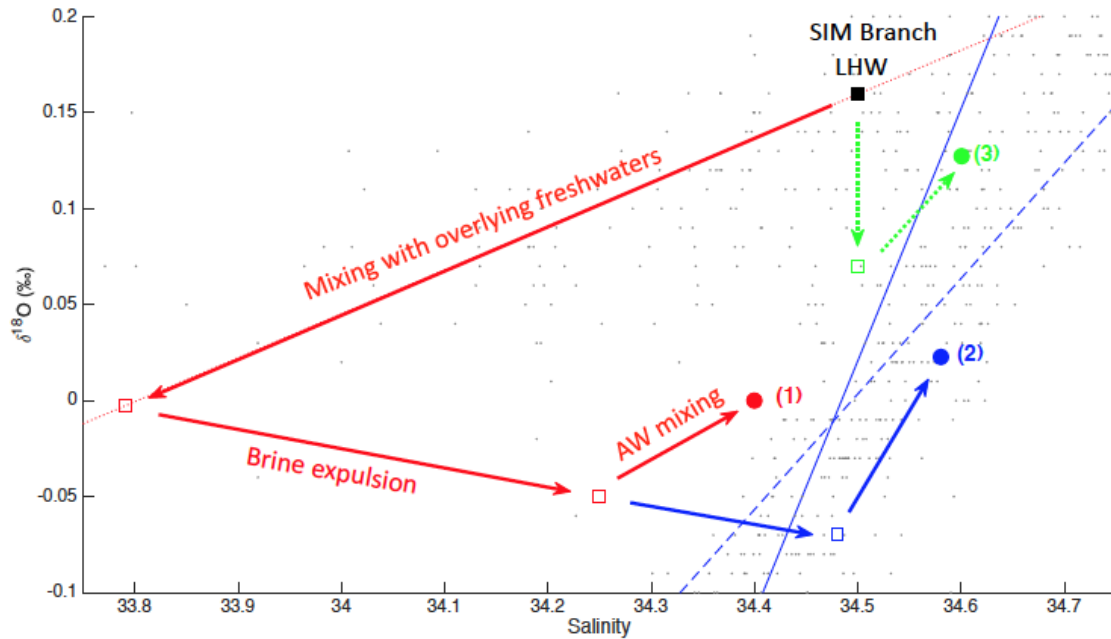

**Figure S1.** Schematic of the transition of lower halocline waters from the SIM branch to the MW branch via mixing with overlying freshwaters, salinization through sea ice formation/brine release, and mixing with Atlantic waters (AW). The red pathway illustrates the effect of vertical mixing down to ~60 m (the mean winter mixed layer depth at SIM branch stations), brine expulsion due to the formation of 1 m of sea ice, and mixing with AW in a 25:75 ratio to form lower halocline water with a salinity of 34.4 and  $\delta^{18}\text{O}$  of 0 ‰ (1). The blue pathway deviates from the red pathway due to additional ice formation (1.5 m instead of 1 m) to form lower halocline water with a salinity of 34.58 and  $\delta^{18}\text{O}$  of 0.02 ‰ (2). The green pathway illustrates the effect of vertical mixing to 100 m, 1 m of sea ice formation, and AW mixing to form lower halocline water with a salinity of 34.6 and  $\delta^{18}\text{O}$  of 0.13 ‰ (3). The regression lines representing the SIM branch (red, dotted line), upper MW branch (blue, dashed line), and lower MW branch (blue, solid line) are also shown for reference. The gray dots indicate data collected during the 2013 cruise. Empty squares indicate transition points after each step (freshwater mixing, brine expulsion, and AW mixing) whereas filled circles indicate the final halocline water product formed by the three potential pathways. All three pathways yield salinity and  $\delta^{18}\text{O}$  combinations near (but not directly on) the MW mixing branches, indicating some additional processes and/or mixing (such as freshwater influence from river runoff) takes place during the transition from the SIM branch to the MW branch.

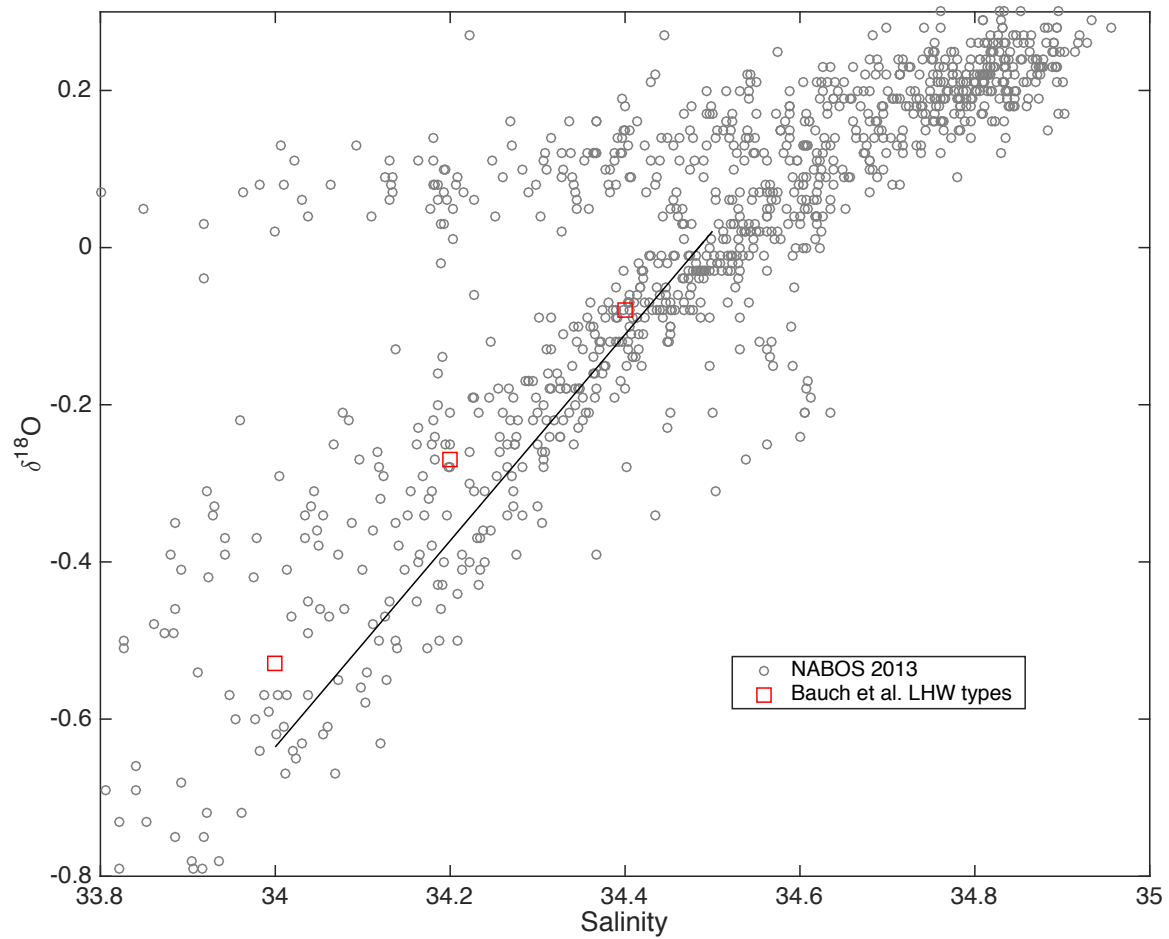

**Figure S2.** Plots of salinity versus the stable oxygen isotopic ratio ( $\delta^{18}\text{O}$ ) measured during the 2013 cruise (gray circles) and characteristic values for the c2 ( $S = 34$ ,  $\delta^{18}\text{O} = -0.53\text{‰}$ ), c3 ( $S = 34.2$ ,  $\delta^{18}\text{O} = -0.27\text{‰}$ ), and c4 ( $S = 34.4$ ,  $\delta^{18}\text{O} = -0.08\text{‰}$ ) lower halocline water (LHW) water types (red squares) defined in *Bauch et al.* [2016]. The c1 LHW type ( $S = 33.0$ ,  $\delta^{18}\text{O} = -1.46\text{‰}$ ) is not shown. The linear regression defining the lower MW branch ( $\delta^{18}\text{O} = 1.3126 \cdot S - 45.2639$ ) is included as a black, solid line. Note that a separate linear regression of the values characterizing the four LHW types was  $\delta^{18}\text{O} = 0.9828 \cdot S - 33.901$ .
